# Supplementary material for: Controllable synthesis of silver nanoparticle-decorated reduced graphene oxide hybrids for ammonia detection
Source: Royal Society of Chemistry journal article supplement (doi:10.1039/c3an36922f), 2013-01-01
Supplement: c3an36922f.pdf [file c3an36922f.pdf]

Electronic Supplementary Information (ESI)

## Controllable Synthesis of Silver Nanoparticle-Decorated Reduced Graphene Oxide Hybrids for Ammonia Detection

Shumao Cui, Shun Mao, Zhenhai Wen, Jingbo Chang, Yang Zhang, and Junhong Chen\*

*Department of Mechanical Engineering, University of Wisconsin-Milwaukee, 3200 N Cramer*

*Street, Milwaukee, WI, 53211, USA.*

*\*E-mail: jhchen@uwm.edu; Fax: +1-414-229-6958; Tel: +1-414-229-2615*

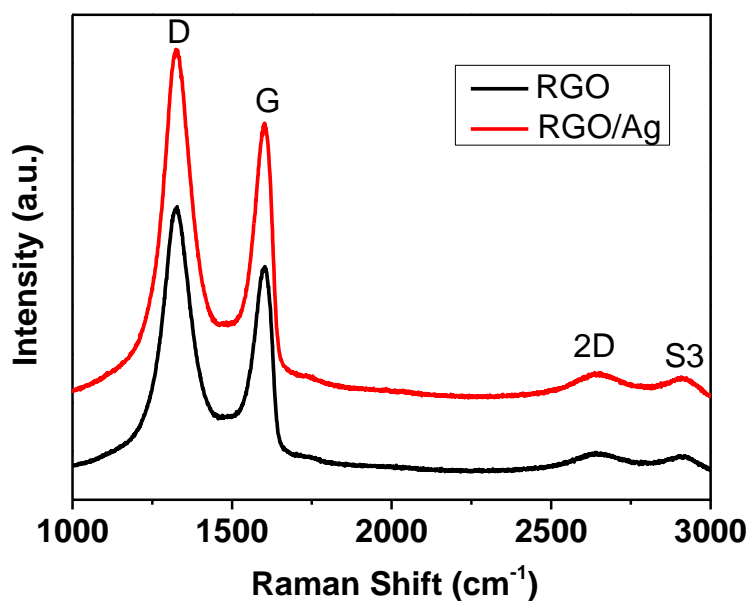

Fig. S1 Raman spectra of RGO and RGO/Ag hybrids.

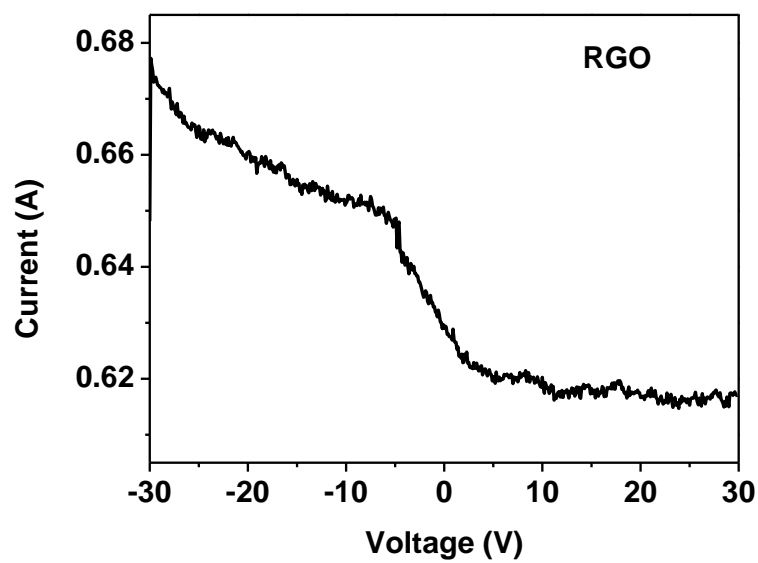

Fig. S2 FET measurement of pure RGO.

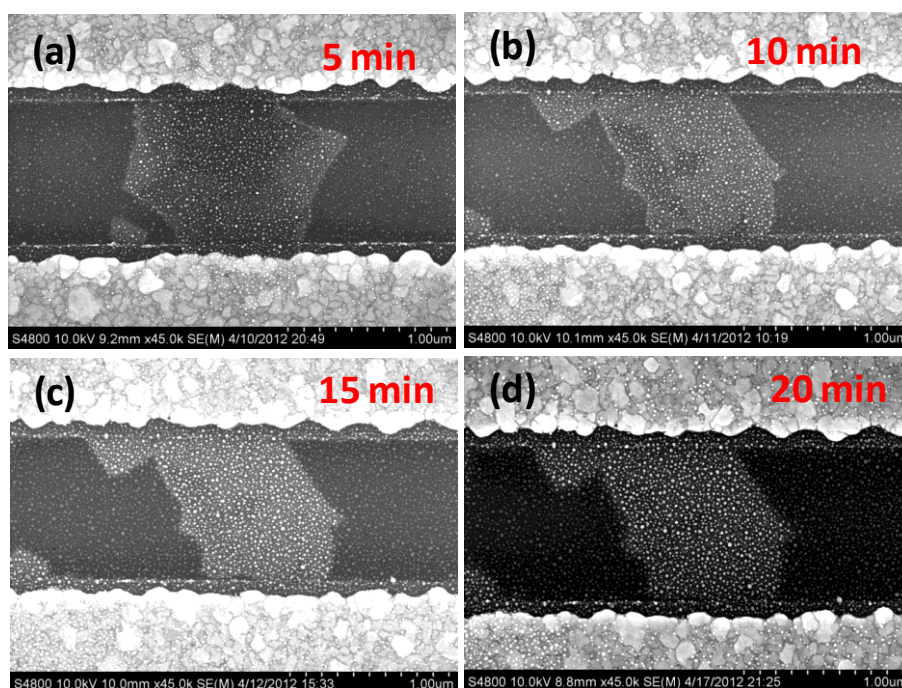

Fig. S3 (a-d) SEM images of RGO flakes decorated with different loadings of Ag NPs controlled by deposition time.

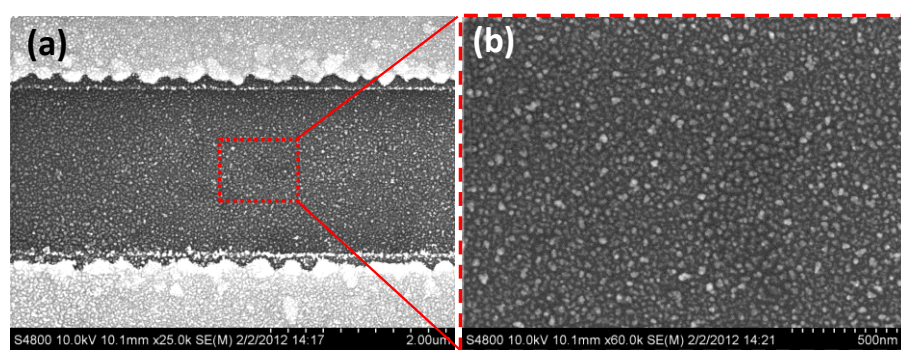

Fig. S4 SEM images of Ag NPs on a gold electrode with deposition time of 1h. Electrical test showed the circuit was still open.

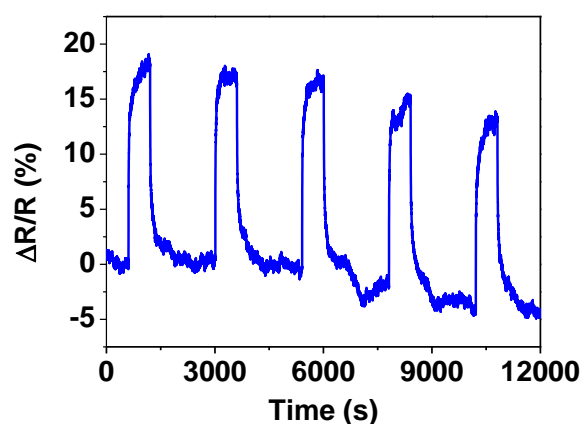

Fig. S5 Dynamic sensing response to 10,000 ppm NH<sub>3</sub> for another RGO/Ag hybrid sensor.
